# Supplementary material for: Assessing the Impact of Genotype-Specific Caprifig Fruit Storage on the Pollination Efficacy and Fruit Quality of “Bursa Siyahı” Cultivar: A Multivariate Analysis Approach
Source: MDPI journal article supplement (doi:10.3390/agronomy14050958), 2024-05-02
Supplement: s1 [file s1]

**Table S1:** Effect of caprifig genotype, storage time and genotype and storage time interaction on the number of *B.psenes* and *P.caricae* and the duration of *B.psenes*'s exit

| Genotype (G)                    | Number of <i>B.psenes</i> (number/fruit) |            |            | Duration of <i>B.psenes</i> 's exit (days) |          |          | Number of <i>P.caricae</i> (number/fruit) |           |          |
|---------------------------------|------------------------------------------|------------|------------|--------------------------------------------|----------|----------|-------------------------------------------|-----------|----------|
|                                 | 2020                                     | 2021       | 2022       | 2020                                       | 2021     | 2022     | 2020                                      | 2021      | 2022     |
| 16 08 05                        | 293.00 a*                                | 146.55 a   | 183.55 bc  | 3.44 a                                     | 2.88 a   | 3.66 a   | 1.22 b                                    | 9.11 a    | 2.00 b   |
| 16 08 09                        | 186.22 bc                                | 86.44 b    | 264.66 a   | 2.33 c                                     | 1.44 c   | 2.88 bc  | 2.22 ab                                   | 1.55 c    | 2.00 b   |
| 16 08 10                        | 155.66 c                                 | 80.88 b    | 148.33 c   | 2.77 b                                     | 2.00 b   | 2.77 c   | 2.22 ab                                   | 2.11 c    | 1.77 b   |
| 16 09 10                        | 287.00 a                                 | 98.55 b    | 168.00 bc  | 3.22 a                                     | 2.00 b   | 3.22 b   | 2.77 a                                    | 3.88 b    | 1.44 b   |
| 16 ZF 08                        | 217.33 b                                 | 109.88 ab  | 204.66 b   | 3.11 ab                                    | 1.88bc   | 3.00 bc  | 2.22 ab                                   | 4.11 b    | 3.88 a   |
| <b>F-value</b>                  | 18.02                                    | 5.63       | 7.01       | 10.53                                      | 10.69    | 6.54     | 3.77                                      | 23.78     | 4.36     |
| <b>Storage time (ST) (days)</b> |                                          |            |            |                                            |          |          |                                           |           |          |
| 0                               | 304.66 a                                 | 191.93 a   | 293.80 a   | 3.80 a                                     | 3.20 a   | 3.86 a   | 2.33 a                                    | 5.13 a    | 2.40     |
| 8                               | 218.80 b                                 | 94.40 b    | 181.40 b   | 2.73 b                                     | 2.06 b   | 3.13 b   | 1.33 b                                    | 4.26 ab   | 2.13     |
| 16                              | 160.06 c                                 | 27.13 c    | 106.33 c   | 2.40 c                                     | 0.86 c   | 2.33 c   | 2.73 a                                    | 3.06 b    | 2.13     |
| <b>F-value</b>                  | 42.95                                    | 61.31      | 52.15      | 50.03                                      | 88.12    | 51.93    | 7.58                                      | 4.80      | 0.18     |
| <b>Interaction G × ST</b>       |                                          |            |            |                                            |          |          |                                           |           |          |
| 16 08 05 × 0 <sup>th</sup> day  | 404.00 a*                                | 187.66 ab  | 306.60 b   | 4.60 a                                     | 3.60 a   | 5.00 a   | 2.00 cde                                  | 8.60 ab   | 2.60 bcd |
| 16 08 05 × 8 <sup>th</sup> day  | 325.00 bc                                | 133.20 bcd | 193.20 cd  | 3.00 cde                                   | 2.60 bcd | 3.60 bc  | 1.20 def                                  | 8.00 abc  | 2.20 bcd |
| 16 08 05 × 16 <sup>th</sup> day | 150.00 fgh                               | 118.66 cde | 50.60 f    | 2.60 def                                   | 2.20 cd  | 2.20 ef  | 0.20 ef                                   | 10.60 a   | 1.00 cd  |
| 16 08 09 × 0 <sup>th</sup> day  | 261.00 cd                                | 178.33 abc | 414.00 a   | 3.60 bc                                    | 3.00 abc | 3.60 bc  | 2.00 cde                                  | 2.20 efgh | 2.60 bcd |
| 16 08 09 × 8 <sup>th</sup> day  | 90.00 h                                  | 80.00 def  | 280.00 b   | 1.20 g                                     | 1.00 de  | 2.60 cde | 1.20 def                                  | 1.60 fgh  | 2.60 bcd |
| 16 08 09 × 16 <sup>th</sup> day | 207.60 efg                               | 3.00 g     | 100.00 ef  | 2.00 fg                                    | 0.20 e   | 2.20 ef  | 3.20 abc                                  | 0.60 h    | 1.00 cd  |
| 16 08 10 × 0 <sup>th</sup> day  | 210.00 def                               | 163.32 bc  | 239.20 bc  | 3.20 bcd                                   | 2.60 bcd | 3.20 bcd | 2.00 cde                                  | 3.20 efg  | 0.60 d   |
| 16 08 10 × 8 <sup>th</sup> day  | 138.20 fgh                               | 64.320 efg | 98.60 ef   | 3.00 cde                                   | 2.20 cd  | 3.00 cde | 0.20 f                                    | 1.60 fgh  | 1.60 bcd |
| 16 08 10 × 16 <sup>th</sup> day | 118.60 gh                                | 15.00 fg   | 107.00 def | 2.00 fg                                    | 1.00 de  | 2.00 f   | 4.60 a                                    | 1.20 gh   | 3.00 abc |
| 16 09 10 × 0 <sup>th</sup> day  | 370.20 ab                                | 237.00 a   | 229.00 bc  | 3.20 bcd                                   | 3.20 ab  | 3.20 bcd | 4.60 a                                    | 6.60 bcd  | 2.60 bcd |
| 16 09 10 × 8 <sup>th</sup> day  | 307.20 bc                                | 58.66 efg  | 161.60 cde | 3.20 bcd                                   | 2.20 cd  | 3.20 bcd | 2.60 bcd                                  | 5.00 cde  | 0.60 d   |
| 16 09 10 × 16 <sup>th</sup> day | 183.20 efg                               | 0.20 g     | 113.20 def | 3.00 cde                                   | 0.20 e   | 3.00 cde | 1.00 def                                  | 0.20 h    | 1.00 cd  |
| 16 ZF 08 × 0 <sup>th</sup> day  | 278.00 cd                                | 193.20 ab  | 280.00 b   | 4.00 ab                                    | 3.20 ab  | 4.00 b   | 1.00 def                                  | 4.60 def  | 3.20 ab  |
| 16 ZF 08 × 8 <sup>th</sup> day  | 233.20 de                                | 135.66 bcd | 173.20 cde | 3.00 cde                                   | 2.00 cd  | 3.00 cde | 1.20 def                                  | 5.00 cde  | 3.20 ab  |
| 16 ZF 08 × 16 <sup>th</sup> day | 140.60 fgh                               | 0.60 g     | 160.60 cde | 2.20 ef                                    | 0.20 e   | 2.00 f   | 4.20 ab                                   | 2.60 efgh | 5.00 a   |
| <b>F-value</b>                  | 150.60                                   | 220.15     | 78.16      | 7.85                                       | 6.22     | 8.25     | 5.26                                      | 10.12     | 12.25    |
| <b>Factor (p-value)</b>         |                                          |            |            |                                            |          |          |                                           |           |          |
| G                               | <0.01**                                  | 0.01*      | <0.01**    | <0.01**                                    | <0.01**  | <0.01**  | 0.04*                                     | <0.01**   | <0.01    |
| ST                              | <0.01**                                  | <0.01**    | <0.01**    | <0.01**                                    | <0.01**  | <0.01**  | <0.01**                                   | 0.01*     | 0.83 ns  |
| G × ST                          | <0.01**                                  | 0.03*      | 0.01*      | <0.01**                                    | 0.01*    | <0.01**  | <0.01**                                   | 0.02*     | 0.04*    |

\* and \*\* within a column indicate a significant difference at the  $p < 0.05$  and  $p < 0.01$  level. (ns: not significant). Small letters indicate a significant difference according to the Duncan test,  $p < 0.05$ .

**Table S2:** Effects of the caprifig genotype, storage time and genotype and storage time interaction on pollen viability, germination, equatorial diameter, and polar length.

| Genotype<br>(G)                 | Pollen viability (%) |                     |                   | Pollen germination (%) |                     |                     | Equatorial diameter (µm) |                     |                    | Polar length (µm)  |                    |                    |
|---------------------------------|----------------------|---------------------|-------------------|------------------------|---------------------|---------------------|--------------------------|---------------------|--------------------|--------------------|--------------------|--------------------|
|                                 | 2020                 | 2021                | 2022              | 2020                   | 2021                | 2022                | 2020                     | 2021                | 2022               | 2020               | 2021               | 2022               |
| 16 08 05                        | 75.0 <sup>b*</sup>   | 80.6 <sup>a</sup>   | 88.9 <sup>a</sup> | 26.3 <sup>c</sup>      | 46.1 <sup>b</sup>   | 45.3 <sup>a</sup>   | 9.64 <sup>b</sup>        | 9.42 <sup>d</sup>   | 9.98 <sup>b</sup>  | 9.36 <sup>b</sup>  | 9.31 <sup>b</sup>  | 9.56 <sup>bc</sup> |
| 16 08 09                        | 76.9 <sup>ab</sup>   | 82.4 <sup>a</sup>   | 87.1 <sup>a</sup> | 38.9 <sup>a</sup>      | 44.3 <sup>b</sup>   | 40.6 <sup>b</sup>   | 10.44 <sup>a</sup>       | 10.34 <sup>ab</sup> | 10.39 <sup>a</sup> | 9.70 <sup>ab</sup> | 9.56 <sup>b</sup>  | 9.98 <sup>a</sup>  |
| 16 08 10                        | 79.6 <sup>ab</sup>   | 83.3 <sup>a</sup>   | 82.4 <sup>b</sup> | 26.0 <sup>c</sup>      | 35.9 <sup>c</sup>   | 23.9 <sup>d</sup>   | 9.87 <sup>b</sup>        | 9.94 <sup>bc</sup>  | 9.74 <sup>b</sup>  | 9.59 <sup>ab</sup> | 9.49 <sup>b</sup>  | 9.43 <sup>bc</sup> |
| 16 09 10                        | 81.2 <sup>a</sup>    | 84.1 <sup>a</sup>   | 86.1 <sup>a</sup> | 33.7 <sup>b</sup>      | 53.9 <sup>a</sup>   | 39.3 <sup>b</sup>   | 10.30 <sup>a</sup>       | 10.43 <sup>a</sup>  | 10.38 <sup>a</sup> | 10.07 <sup>a</sup> | 10.12 <sup>a</sup> | 10.11 <sup>a</sup> |
| 16 ZF 08                        | 67.2 <sup>c</sup>    | 65.0 <sup>b</sup>   | 89.3 <sup>a</sup> | 28.2 <sup>c</sup>      | 33.2 <sup>c</sup>   | 32.2 <sup>c</sup>   | 9.90 <sup>b</sup>        | 9.79 <sup>cd</sup>  | 9.78 <sup>b</sup>  | 9.10 <sup>b</sup>  | 9.48 <sup>b</sup>  | 9.30 <sup>c</sup>  |
| <b>F-value</b>                  | 10.96                | 48.76               | 6.54              | 24.50                  | 23.63               | 43.85               | 11.82                    | 13.23               | 25.24              | 5.29               | 24.28              | 21.35              |
| <b>Storage time (ST) (days)</b> |                      |                     |                   |                        |                     |                     |                          |                     |                    |                    |                    |                    |
| 0                               | 74.2 <sup>b</sup>    | 85.6 <sup>a</sup>   | 88.1 <sup>a</sup> | 28.9                   | 41.7 <sup>b</sup>   | 30.4 <sup>b</sup>   | 10.04                    | 9.98                | 10.06              | 9.62               | 9.60               | 9.70               |
| 8                               | 75.1 <sup>ab</sup>   | 73.1 <sup>c</sup>   | 88.6 <sup>a</sup> | 31.4                   | 40.4 <sup>b</sup>   | 40.1 <sup>a</sup>   | 10.04                    | 9.95                | 10.04              | 9.41               | 9.61               | 9.68               |
| 16                              | 78.6 <sup>a</sup>    | 78.4 <sup>b</sup>   | 84.2 <sup>b</sup> | 31.6                   | 45.9 <sup>a</sup>   | 38.6 <sup>a</sup>   | 10.01                    | 9.99                | 10.03              | 9.66               | 9.56               | 9.63               |
| <b>F-value</b>                  | 5.23                 | 51.69               | 11.31             | 2.80                   | 4.73                | 27.10               | 0.94                     | 0.72                | 0.62               | 1.23               | 0.87               | 0.65               |
| <b>Interaction G x ST</b>       |                      |                     |                   |                        |                     |                     |                          |                     |                    |                    |                    |                    |
| 16 08 05 x 0 <sup>th</sup> day  | 68.9 <sup>fgh</sup>  | 87.9 <sup>bc</sup>  | 89.08             | 17.9 <sup>h</sup>      | 45.8 <sup>bcd</sup> | 35.0 <sup>cde</sup> | 9.69                     | 9.40                | 10.02              | 9.30               | 9.31               | 9.62               |
| 16 08 05 x 8 <sup>th</sup> day  | 73.3 <sup>defg</sup> | 72.2 <sup>gh</sup>  | 90.16             | 23.5 <sup>efgh</sup>   | 45.0 <sup>bcd</sup> | 55.5 <sup>a</sup>   | 9.61                     | 9.46                | 9.96               | 9.38               | 9.39               | 9.56               |
| 16 08 05 x 16 <sup>th</sup> day | 82.8 <sup>abc</sup>  | 81.9 <sup>def</sup> | 87.50             | 37.6 <sup>bc</sup>     | 47.5 <sup>bcd</sup> | 45.4 <sup>b</sup>   | 9.63                     | 9.39                | 9.98               | 9.41               | 9.23               | 9.50               |
| 16 08 09 x 0 <sup>th</sup> day  | 80.2 <sup>abcd</sup> | 86.0 <sup>bcd</sup> | 87.87             | 59.4 <sup>a</sup>      | 41.0 <sup>de</sup>  | 30.2 <sup>ef</sup>  | 10.34                    | 10.44               | 10.4               | 9.69               | 9.62               | 10.02              |
| 16 08 09 x 8 <sup>th</sup> day  | 85.1 <sup>ab</sup>   | 77.7 <sup>fg</sup>  | 89.40             | 29.1 <sup>de</sup>     | 42.6 <sup>cd</sup>  | 52.9 <sup>a</sup>   | 10.55                    | 10.22               | 10.37              | 9.64               | 9.56               | 9.99               |
| 16 08 09 x 16 <sup>th</sup> day | 65.3 <sup>gh</sup>   | 83.6 <sup>cde</sup> | 84.17             | 28.3 <sup>def</sup>    | 49.2 <sup>bcd</sup> | 38.8 <sup>c</sup>   | 10.43                    | 10.28               | 10.31              | 9.77               | 9.50               | 9.93               |
| 16 08 10 x 0 <sup>th</sup> day  | 71.7 <sup>efg</sup>  | 90.0 <sup>ab</sup>  | 83.73             | 22.3 <sup>gh</sup>     | 52.5 <sup>ab</sup>  | 31.8 <sup>def</sup> | 9.98                     | 9.98                | 9.75               | 9.56               | 9.56               | 9.42               |
| 16 08 10 x 8 <sup>th</sup> day  | 82.4 <sup>abc</sup>  | 78.8 <sup>ef</sup>  | 84.71             | 32.8 <sup>cd</sup>     | 29.6 <sup>f</sup>   | 19.5 <sup>h</sup>   | 9.81                     | 9.93                | 9.78               | 9.51               | 9.49               | 9.50               |
| 16 08 10 x 16 <sup>th</sup> day | 84.8 <sup>ab</sup>   | 81.3 <sup>def</sup> | 82.02             | 23.0 <sup>fgh</sup>    | 25.6 <sup>fg</sup>  | 20.4 <sup>gh</sup>  | 9.83                     | 9.90                | 9.70               | 9.71               | 9.44               | 9.37               |
| 16 09 10 x 0 <sup>th</sup> day  | 87.4 <sup>a</sup>    | 94.0 <sup>a</sup>   | 90.39             | 23.2 <sup>fgh</sup>    | 50.0 <sup>bc</sup>  | 28.7 <sup>ef</sup>  | 10.38                    | 10.38               | 10.36              | 10.12              | 10.11              | 10.18              |
| 16 09 10 x 8 <sup>th</sup> day  | 74.9 <sup>defg</sup> | 76.3 <sup>fg</sup>  | 86.33             | 36.4 <sup>bc</sup>     | 52.3 <sup>ab</sup>  | 39.0 <sup>c</sup>   | 10.27                    | 10.33               | 10.33              | 10.09              | 10.11              | 10.09              |
| 16 09 10 x 16 <sup>th</sup> day | 81.3 <sup>abcd</sup> | 80.7 <sup>def</sup> | 81.66             | 41.6 <sup>b</sup>      | 59.3 <sup>a</sup>   | 50.3 <sup>ab</sup>  | 10.25                    | 10.53               | 10.43              | 10.00              | 10.13              | 10.05              |
| 16 ZF 08 x 0 <sup>th</sup> day  | 62.8 <sup>hi</sup>   | 70.4 <sup>h</sup>   | 89.59             | 22.0 <sup>gh</sup>     | 19.0 <sup>g</sup>   | 26.6 <sup>fg</sup>  | 9.83                     | 9.74                | 9.80               | 9.47               | 9.40               | 9.30               |
| 16 ZF 08 x 8 <sup>th</sup> day  | 59.8 <sup>i</sup>    | 60.3 <sup>i</sup>   | 92.71             | 35.2 <sup>c</sup>      | 32.6 <sup>ef</sup>  | 31.9 <sup>def</sup> | 9.97                     | 9.79                | 9.78               | 8.43               | 9.57               | 9.27               |
| 16 ZF 08 x 16 <sup>th</sup> day | 78.0 <sup>bcde</sup> | 64.4 <sup>i</sup>   | 85.87             | 27.3 <sup>defg</sup>   | 47.9 <sup>bcd</sup> | 38.2 <sup>cd</sup>  | 9.91                     | 9.85                | 9.76               | 9.40               | 9.48               | 9.33               |
| <b>F-value</b>                  | 8.31                 | 3.63                | 1.72              | 27.08                  | 11.16               | 26.78               | 0.85                     | 1.56                | 2.20               | 0.91               | 0.62               | 1.87               |
| <b>Factor (p-value)</b>         |                      |                     |                   |                        |                     |                     |                          |                     |                    |                    |                    |                    |
| G                               | <0.01**              | <0.01**             | 0.02*             | <0.01**                | <0.01**             | <0.01**             | <0.01**                  | <0.01**             | <0.01**            | <0.01**            | <0.01**            | <0.01**            |
| ST                              | 0.04*                | <0.01**             | <0.01**           | 0.07 ns                | 0.01*               | <0.01**             | 0.06 ns                  | 0.99 ns             | 0.71 ns            | 0.30 ns            | 0.75 ns            | 0.86 ns            |
| G × ST                          | <0.01**              | 0.01*               | 0.32 ns           | <0.01**                | <0.01**             | <0.01**             | 0.96 ns                  | 0.99 ns             | 0.98 ns            | 0.53 ns            | 0.92 ns            | 0.94 ns            |

\* and \*\* within a column indicate a significant difference at the  $p < 0.05$  and  $p < 0.01$  level. (ns: not significant). Small letters indicate a significant difference according to the Duncan test,  $p < 0.05$ .
